# Supplementary material
Source: PubMed Central journal article supplement (PMC7733859)
Supplement: pnas.2014021117.sapp.pdf [file pnas.2014021117.sapp.pdf]

## Supporting Information for Watanabe et al. (2020) PNAS

**Movie S1.** Footage from seal-borne video cameras showing feeding events on amphipods.

**Movie S2.** Footage from seal-borne video cameras showing feeding events on fishes.

**Movie S3.** Footage from seal-borne video cameras showing a sequence of frequent feeding events on amphipods.

**Table S1.** Descriptive information on the Baikal seals tagged and an overview of the data.

| Seal no. | Release date (yyyy/m/d) | Sex | Body length (cm) <sup>a</sup> | Body mass (kg) | Accelerometer data length (h) | Video footage of feeding events? | % of time spent in |                                     |                    |             |
|----------|-------------------------|-----|-------------------------------|----------------|-------------------------------|----------------------------------|--------------------|-------------------------------------|--------------------|-------------|
|          |                         |     |                               |                |                               |                                  | Dive bouts         | Surfacing events between dive bouts | Resting dive bouts | Hauling out |
| 1        | 2018/6/1                | F   | 120                           | 44.8           | 45.8                          | Yes                              | 91.3               | 4.2                                 | 4.5                | 0.0         |
| 2        | 2018/6/2                | F   | 114                           | 38.5           | 45.8                          | Yes                              | 69.6               | 17.7                                | 2.9                | 9.8         |
| 3        | 2018/6/2                | M   | 148                           | 69.1           | 68.1                          | No                               | 38.3               | 10.7                                | 2.4                | 48.7        |
| 4        | 2018/6/3                | F   | 130                           | 65.5           | 70.5                          | No                               | 53.1               | 13.8                                | 0.0                | 33.1        |
| 5        | 2018/6/4                | F   | 123                           | 42.0           | 70.4                          | No                               | 53.0               | 5.6                                 | 0.0                | 41.4        |
| 6        | 2018/6/5                | F   | 119                           | 41.6           | 70.5                          | No                               | 35.1               | 9.7                                 | 0.0                | 55.2        |
| 7        | 2018/6/6                | F   | 133                           | 49.0           | 94.0                          | No                               | 60.5               | 8.7                                 | 15.0               | 15.7        |
| 8        | 2018/6/8                | M   | 145                           | 59.7           | 93.7                          | Yes                              | 80.7               | 7.9                                 | 9.3                | 2.0         |

<sup>a</sup>Straight length from snout tip to tail tip.

**Table S2.** Diving and amphipod-feeding behavior of Baikal seals.

| Seal no. | Accelerometer data length (h) | No. of dives | Dive depth (m)    |       | Dive duration (min) |      | No. of amphipod-feeding dives <sup>a</sup> | Mean ( $\pm$ SD) no. of amphipod-feeding events per dive <sup>b</sup> | Total no. of amphipod-feeding events <sup>b</sup> | No. of amphipod-feeding events per 24-h active period <sup>b</sup> |
|----------|-------------------------------|--------------|-------------------|-------|---------------------|------|--------------------------------------------|-----------------------------------------------------------------------|---------------------------------------------------|--------------------------------------------------------------------|
|          |                               |              | Mean $\pm$ SD     | Max.  | Mean $\pm$ SD       | Max. |                                            |                                                                       |                                                   |                                                                    |
| 1        | 45.8                          | 320          | 98.5 $\pm$ 99.2   | 348.8 | 7.1 $\pm$ 3.2       | 14.0 | 54                                         | 49 $\pm$ 37                                                           | 2647                                              | 1520                                                               |
| 2        | 45.8                          | 202          | 93.7 $\pm$ 73.6   | 298.4 | 8.1 $\pm$ 3.0       | 15.2 | 93                                         | 42 $\pm$ 36                                                           | 3936                                              | 2964                                                               |
| 3        | 68.1                          | 192          | 85.7 $\pm$ 94.8   | 313.7 | 7.7 $\pm$ 3.6       | 13.9 | 122                                        | 60 $\pm$ 54                                                           | 7366                                              | 6779                                                               |
| 4        | 70.5                          | 328          | 66.7 $\pm$ 82.0   | 374.8 | 6.0 $\pm$ 4.9       | 16.0 | 120                                        | 60 $\pm$ 28                                                           | 7256                                              | 4653                                                               |
| 5        | 70.4                          | 278          | 72.8 $\pm$ 56.7   | 219.6 | 7.0 $\pm$ 2.7       | 11.8 | 61                                         | 89 $\pm$ 41                                                           | 5439                                              | 3498                                                               |
| 6        | 70.5                          | 124          | 172.9 $\pm$ 113.1 | 380.6 | 10.8 $\pm$ 4.1      | 16.0 | 84                                         | 50 $\pm$ 26                                                           | 4239                                              | 4107                                                               |
| 7        | 94.0                          | 706          | 37.4 $\pm$ 46.8   | 235.4 | 5.4 $\pm$ 3.7       | 14.2 | 321                                        | 58 $\pm$ 35                                                           | 18707                                             | 7892                                                               |
| 8        | 93.7                          | 440          | 143.0 $\pm$ 86.8  | 344.9 | 10.0 $\pm$ 3.6      | 20.3 | 181                                        | 49 $\pm$ 37                                                           | 8867                                              | 2813                                                               |

<sup>a</sup>Detected from accelerometer data based on the behavioral characteristics during dives.

<sup>b</sup>Estimated from acceleration signals.

**A**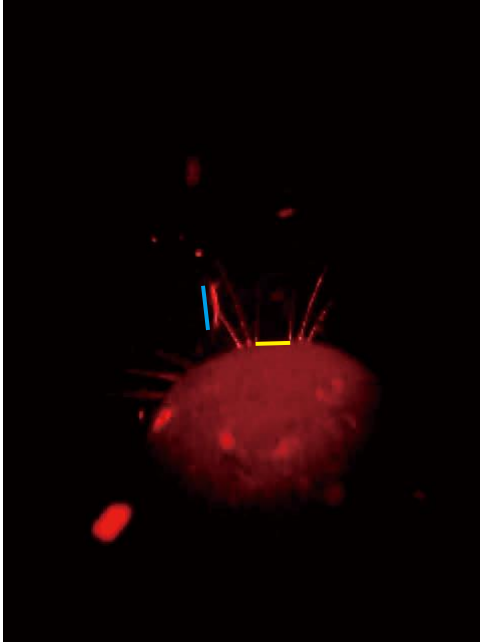**B**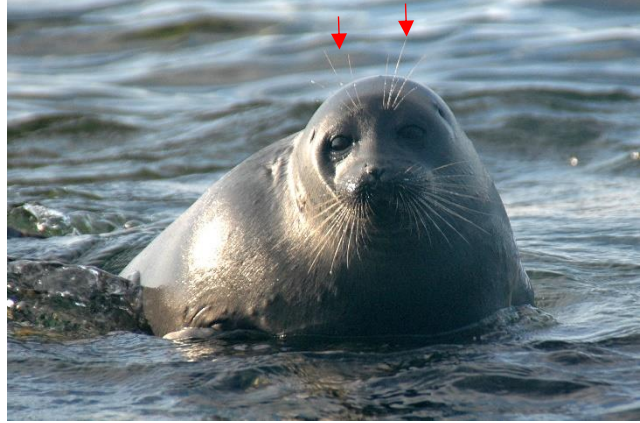

**Fig. S1.** Estimating body length of the amphipods hunted by seals. (A) Image from seal-borne video footage, showing the seal (back of the head is visible) about to hunt an amphipod. The length of the amphipod (light blue line) was measured as the relative length to the distance between the paired, inner eye whiskers of the seal (yellow line), which is 20 mm. (B) Photo of a Baikal seal (Credit: Y.Y.W.), showing well-developed eye whiskers (red arrows).

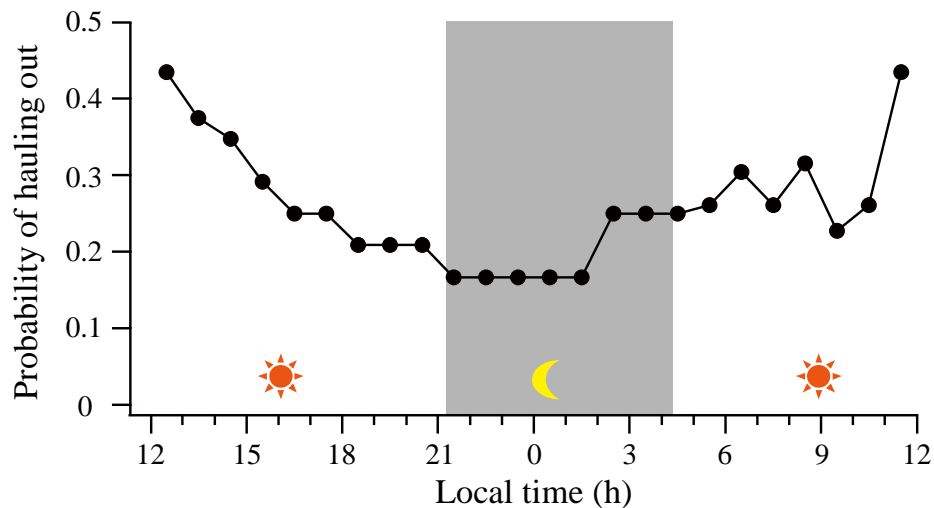

**Fig. S2.** Baikal seals tended to haul out during the daytime. The probability of hauling out calculated from all accelerometer data ( $n=8$  seals) is plotted against time of day. Background color represents the day (white) and night (grey) based on the local sunset and sunrise time.

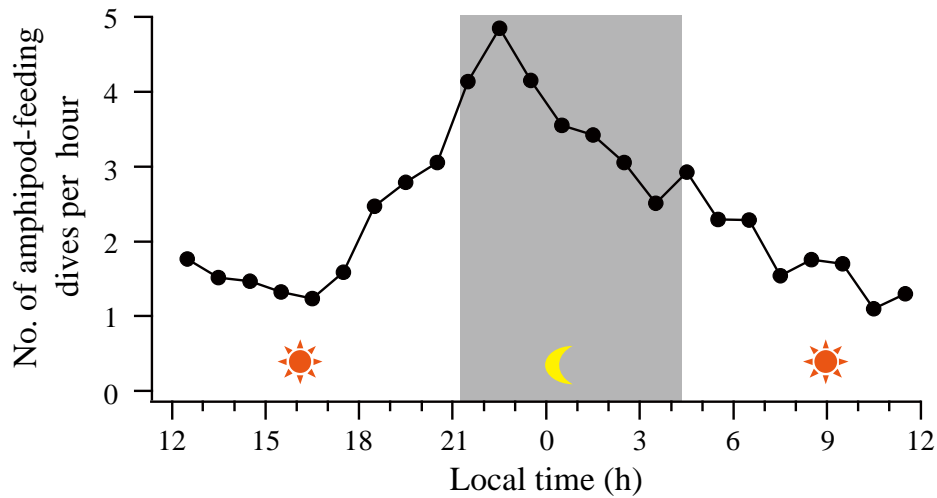

**Fig. S3.** Amphipod-feeding dives tended to occur at night. The number of amphipod-feeding dives per hour detected from all accelerometer data ( $n=8$  seals) is plotted against time of day. Because seals tended to haul out during the daytime (Fig. S2), the periods of hauling out were excluded from the calculation. Background color represents the day (white) and night (grey) based on the local sunset and sunrise time.

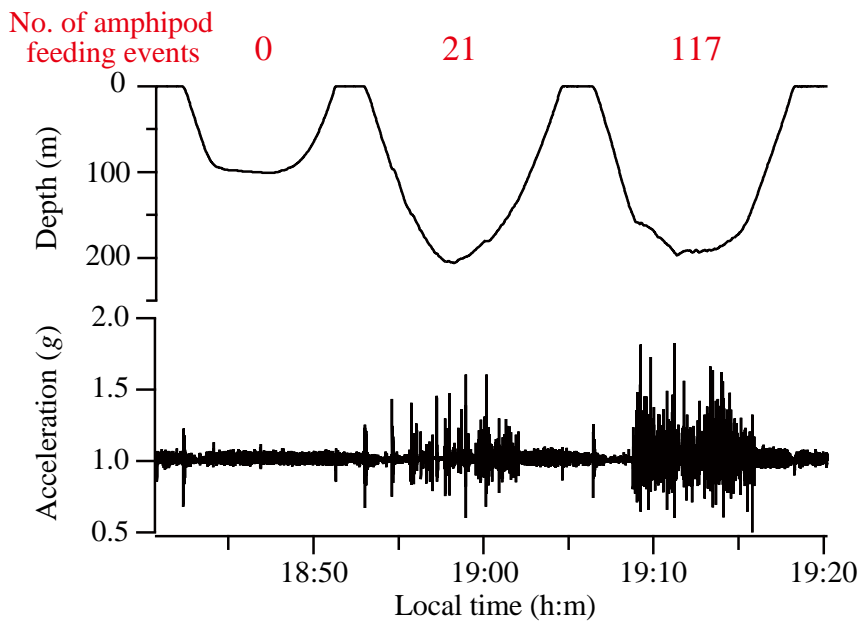

**Fig. S4.** Foraging rates associated with body acceleration during dives. Three successive dives recorded for a seal are shown with body acceleration (i.e., the vectorial sum of triaxial accelerations) and the number of amphipod-feeding events confirmed by the video footage.
